# Supplementary material for: Is There an Independent Role of TERT and NF1 in High Grade Gliomas?
Source: PubMed Central journal article supplement — Transl Oncol. 2019 Dec 28;13(2):346–54. doi: 10.1016/j.tranon.2019.10.016 (PMC6940679; doi:10.1016/j.tranon.2019.10.016), 2019-12-28
Supplement: mmc2.pdf [file mmc2.pdf]

Supplemental Table S2. Frequency distribution of mutations by grade.

| Gene                       | Total (N=101) |       | Grade III (N=16) |       | Grade IV (N=85) |       |
|----------------------------|---------------|-------|------------------|-------|-----------------|-------|
|                            | N             | %     | N                | %     | N               | %     |
| <b>ABCC9</b>               |               |       |                  |       |                 |       |
| Wild-type                  | 98            | 97.03 | 16               | 100   | 82              | 96.47 |
| Mutated                    | 3             | 2.97  | 0                | 0.0   | 3               | 3.53  |
| <b>ARHGAP5</b>             |               |       |                  |       |                 |       |
| Wild-type                  | 100           | 99.01 | 16               | 100   | 84              | 98.82 |
| Mutated                    | 1             | 0.99  | 0                | 0.0   | 1               | 1.18  |
| <b>ATRX</b>                |               |       |                  |       |                 |       |
| Wild-type                  | 95            | 94.06 | 15               | 93.75 | 80              | 94.12 |
| Mutated                    | 6             | 5.94  | 1                | 6.25  | 5               | 5.88  |
| <b>BRAF</b>                |               |       |                  |       |                 |       |
| Wild-type                  | 97            | 96.04 | 16               | 100   | 81              | 95.29 |
| Mutated                    | 4             | 3.96  | 0                | 0.0   | 4               | 4.71  |
| <b>BRCA1</b>               |               |       |                  |       |                 |       |
| Wild-type                  | 97            | 96.04 | 16               | 100   | 81              | 95.29 |
| Mutated                    | 4             | 3.96  | 0                | 0.0   | 4               | 4.71  |
| <b>CDH18</b>               |               |       |                  |       |                 |       |
| Wild-type                  | 100           | 99.01 | 16               | 100   | 84              | 98.82 |
| Mutated                    | 1             | 0.99  | 0                | 0.0   | 1               | 1.18  |
| <b>CDK4</b>                |               |       |                  |       |                 |       |
| Wild-type                  | 100           | 99.01 | 16               | 100   | 84              | 98.82 |
| Mutated                    | 1             | 0.99  | 0                | 0.0   | 1               | 1.18  |
| <b>CDKN2C</b>              |               |       |                  |       |                 |       |
| Wild-type                  | 100           | 99.01 | 16               | 100   | 84              | 98.82 |
| Mutated                    | 1             | 0.99  | 0                | 0.0   | 1               | 1.18  |
| <b>CIC</b>                 |               |       |                  |       |                 |       |
| Wild-type                  | 99            | 98.02 | 16               | 100   | 83              | 97.65 |
| Mutated                    | 2             | 1.98  | 0                | 0.0   | 2               | 2.35  |
| <b>COL1A2</b>              |               |       |                  |       |                 |       |
| Wild-type                  | 100           | 99.01 | 16               | 100   | 84              | 98.82 |
| Mutated                    | 1             | 0.99  | 0                | 0.0   | 1               | 1.18  |
| <b>CREBBP</b>              |               |       |                  |       |                 |       |
| Wild-type                  | 99            | 98.02 | 16               | 100   | 83              | 97.65 |
| Mutated                    | 2             | 1.98  | 0                | 0.0   | 2               | 2.35  |
| <b>CTNND2</b>              |               |       |                  |       |                 |       |
| Wild-type                  | 98            | 97.03 | 16               | 100   | 82              | 96.47 |
| Mutated                    | 3             | 2.97  | 0                | 0.0   | 3               | 3.53  |
| <b>DAXX</b>                |               |       |                  |       |                 |       |
| Wild-type                  | 99            | 98.02 | 16               | 100   | 83              | 97.65 |
| Mutated                    | 2             | 1.98  | 0                | 0.0   | 2               | 2.35  |
| <b>DNAH3</b>               |               |       |                  |       |                 |       |
| Wild-type                  | 100           | 99.01 | 16               | 100   | 84              | 98.82 |
| Mutated                    | 1             | 0.99  | 0                | 0.0   | 1               | 1.18  |
| <b>DSG3</b>                |               |       |                  |       |                 |       |
| Wild-type                  | 100           | 99.01 | 16               | 100   | 84              | 98.82 |
| Mutated                    | 1             | 0.99  | 0                | 0.0   | 1               | 1.18  |
| <b>EGFR</b>                |               |       |                  |       |                 |       |
| Wild-type                  | 86            | 85.15 | 15               | 93.75 | 71              | 83.53 |
| Mutated                    | 15            | 14.85 | 1                | 6.25  | 14              | 16.47 |
| <b>ERBB2</b>               |               |       |                  |       |                 |       |
| Wild-type                  | 100           | 99.01 | 16               | 100   | 84              | 98.82 |
| Mutated                    | 1             | 0.99  | 0                | 0.0   | 1               | 1.18  |
| <b>FGFR3</b>               |               |       |                  |       |                 |       |
| Wild-type                  | 100           | 99.01 | 16               | 100   | 84              | 98.82 |
| Mutated                    | 1             | 0.99  | 0                | 0.0   | 1               | 1.18  |
| <b>IDH1</b>                |               |       |                  |       |                 |       |
| Wild-type                  | 88            | 87.13 | 6                | 37.50 | 82              | 96.47 |
| Mutated                    | 13            | 12.87 | 10               | 62.50 | 3               | 3.53  |
| <b>IDH2</b>                |               |       |                  |       |                 |       |
| Wild-type                  | 100           | 99.01 | 16               | 100   | 84              | 98.82 |
| Mutated                    | 1             | 0.99  | 0                | 0.0   | 1               | 1.18  |
| <b>IDH1/2</b>              |               |       |                  |       |                 |       |
| Wild-type                  | 87            | 86.10 | 6                | 37.50 | 81              | 95.29 |
| Mutated                    | 14            | 13.90 | 10               | 62.50 | 4               | 4.71  |
| <b>KEL</b>                 |               |       |                  |       |                 |       |
| Wild-type                  | 97            | 96.04 | 16               | 100   | 81              | 95.29 |
| Mutated                    | 4             | 3.96  | 0                | 0.0   | 4               | 4.71  |
| <b>LZTR1</b>               |               |       |                  |       |                 |       |
| Wild-type                  | 97            | 96.04 | 16               | 100   | 81              | 95.29 |
| Mutated                    | 4             | 3.96  | 0                | 0.0   | 4               | 4.71  |
| <b>MET</b>                 |               |       |                  |       |                 |       |
| Wild-type                  | 99            | 98.02 | 16               | 100   | 83              | 97.65 |
| Mutated                    | 2             | 1.98  | 0                | 0.0   | 2               | 2.35  |
| <b>MIL3</b>                |               |       |                  |       |                 |       |
| Wild-type                  | 100           | 99.01 | 16               | 100   | 84              | 98.82 |
| Mutated                    | 1             | 0.99  | 0                | 0.0   | 1               | 1.18  |
| <b>MIL4</b>                |               |       |                  |       |                 |       |
| Wild-type                  | 99            | 98.02 | 16               | 100   | 83              | 97.65 |
| Mutated                    | 2             | 1.98  | 0                | 0.0   | 2               | 2.35  |
| <b>NF1</b>                 |               |       |                  |       |                 |       |
| Wild-type                  | 94            | 93.07 | 16               | 100   | 78              | 91.76 |
| Mutated                    | 7             | 6.93  | 0                | 0.0   | 7               | 8.24  |
| <b>NOTCH1</b>              |               |       |                  |       |                 |       |
| Wild-type                  | 98            | 97.03 | 16               | 100   | 82              | 96.47 |
| Mutated                    | 3             | 2.97  | 0                | 0.0   | 3               | 3.53  |
| <b>NOTCH2</b>              |               |       |                  |       |                 |       |
| Wild-type                  | 100           | 99.01 | 16               | 100   | 84              | 98.82 |
| Mutated                    | 1             | 0.99  | 0                | 0.0   | 1               | 1.18  |
| <b>NOTCH4</b>              |               |       |                  |       |                 |       |
| Wild-type                  | 99            | 98.02 | 16               | 100   | 83              | 97.65 |
| Mutated                    | 2             | 1.98  | 0                | 0.0   | 2               | 2.35  |
| <b>PDGFRA</b>              |               |       |                  |       |                 |       |
| Wild-type                  | 95            | 94.06 | 16               | 100   | 79              | 92.94 |
| Mutated                    | 6             | 5.94  | 0                | 0.0   | 6               | 7.06  |
| <b>PHLDB1</b>              |               |       |                  |       |                 |       |
| Wild-type                  | 100           | 99.01 | 16               | 100   | 84              | 98.82 |
| Mutated                    | 1             | 0.99  | 0                | 0.0   | 1               | 1.18  |
| <b>PIK3CA</b>              |               |       |                  |       |                 |       |
| Wild-type                  | 99            | 98.02 | 16               | 100   | 83              | 97.65 |
| Mutated                    | 2             | 1.98  | 0                | 0.0   | 2               | 2.35  |
| <b>PTEN</b>                |               |       |                  |       |                 |       |
| Wild-type                  | 95            | 94.06 | 16               | 100   | 79              | 92.94 |
| Mutated                    | 6             | 5.94  | 0                | 0.0   | 6               | 7.06  |
| <b>RTEL1</b>               |               |       |                  |       |                 |       |
| Wild-type                  | 100           | 99.01 | 15               | 93.75 | 85              | 100   |
| Mutated                    | 1             | 0.99  | 1                | 6.25  | 0               | 0.0   |
| <b>SETD2</b>               |               |       |                  |       |                 |       |
| Wild-type                  | 100           | 99.01 | 16               | 100   | 84              | 98.82 |
| Mutated                    | 1             | 0.99  | 0                | 0.0   | 1               | 1.18  |
| <b>SPTA1</b>               |               |       |                  |       |                 |       |
| Wild-type                  | 99            | 98.02 | 16               | 100   | 83              | 97.65 |
| Mutated                    | 2             | 1.98  | 0                | 0.0   | 2               | 2.35  |
| <b>TP53</b>                |               |       |                  |       |                 |       |
| Wild-type                  | 76            | 75.25 | 8                | 50.0  | 68              | 80.00 |
| Mutated                    | 25            | 24.75 | 8                | 50.0  | 17              | 20.00 |
| <b>TERT</b>                |               |       |                  |       |                 |       |
| Mutated                    | 75            | 74.26 | 9                | 56.25 | 66              | 77.65 |
| Wild-type                  | 26            | 25.74 | 7                | 43.75 | 19              | 22.35 |
| <b>TERT/NF1</b>            |               |       |                  |       |                 |       |
| Both wild-type             | 25            | 24.75 | 7                | 43.75 | 18              | 21.18 |
| Both mutated               | 6             | 5.94  | 0                | 0.0   | 6               | 7.06  |
| TERT mutated/NF1 wild-type | 69            | 68.32 | 9                | 56.25 | 60              | 70.59 |
| TERT wild-type/NF1 mutated | 1             | 0.99  | 0                | 0.0   | 1               | 1.18  |
| <b>MGMT</b>                |               |       |                  |       |                 |       |
| Unknown                    | 24            | 23.76 | 5                | 31.25 | 19              | 22.35 |
| Unmethylated               | 22            | 21.78 | 1                | 6.25  | 21              | 24.71 |
| Methylated                 | 55            | 54.46 | 10               | 62.50 | 45              | 52.35 |

Supplemental Table S3. Results of the Cox univariate regression with respect to OS.

| Parameter                 | Categories                  | N of patients | N of events | HR   | 95% CI    | P-value          |
|---------------------------|-----------------------------|---------------|-------------|------|-----------|------------------|
| ATRX                      | Mutated vs. Wild-type       | 6 vs. 95      | 6 vs.81     | 1.54 | 0.67-3.54 | 0.313            |
| EGFR                      | Mutated vs. Wild-type       | 15 vs. 86     | 14 vs.73    | 1.39 | 0.78-2.47 | 0.262            |
| IDH1/2                    | Mutated vs. Wild-type       | 14 vs. 87     | 8 vs.79     | 0.24 | 0.11-0.52 | <b>&lt;0.001</b> |
| NF1                       | Mutated vs. Wild-type       | 7 vs. 94      | 7 vs.80     | 3.19 | 1.44-7.06 | <b>0.004</b>     |
| PDGFRA                    | Mutated vs. Wild-type       | 6 vs. 95      | 6 vs.81     | 1.73 | 0.75-3.98 | 0.201            |
| PTEN                      | Mutated vs. Wild-type       | 6 vs. 95      | 6 vs.81     | 1.37 | 0.60-3.16 | 0.455            |
| TP53                      | Mutated vs. Wild-type       | 25 vs. 76     | 22 vs.65    | 0.88 | 0.54-1.44 | 0.619            |
| TERT                      | Mutated vs. Wild-type       | 75 vs. 26     | 68 vs.19    | 2.28 | 1.36-3.83 | <b>0.002</b>     |
| MGMT                      | Methylated vs. Unmethylated | 55 vs. 22     | 44 vs. 21   | 0.47 | 0.28-0.80 | <b>0.006</b>     |
| N mutations per tumor     |                             |               |             | 1.02 | 0.99-1.05 | 0.213            |
| N mutated genes per tumor |                             |               |             | 1.04 | 0.97-1.10 | 0.269            |
| Age                       |                             |               |             | 1.05 | 1.03-1.07 | <b>&lt;0.001</b> |
| Ki67                      |                             |               |             | 0.99 | 0.98-1.00 | 0.177            |

N, number; HR, hazard ratio; CI, confidence interval

Supplemental Table S4. Results of the Cox univariate regression with respect to OS in patients with wild-type IDH1/2 tumors.

| Parameter                 | Categories                  | N of patients | N of events | HR   | 95% CI    | P-value          |
|---------------------------|-----------------------------|---------------|-------------|------|-----------|------------------|
| EGFR                      | Mutated vs. Wild-type       | 14 vs. 73     | 13 vs.66    | 1.20 | 0.66-2.18 | 0.560            |
| NF1                       | Mutated vs. Wild-type       | 7 vs. 80      | 7 vs.72     | 2.70 | 1.22-5.97 | <b>0.014</b>     |
| TP53                      | Mutated vs. Wild-type       | 16 vs. 71     | 16 vs.63    | 1.63 | 0.94-2.85 | 0.085            |
| TERT                      | Mutated vs. Wild-type       | 68 vs. 19     | 63 vs. 16   | 1.99 | 1.14-3.47 | <b>0.015</b>     |
| MGMT                      | Methylated vs. Unmethylated | 45 vs. 22     | 39 vs. 21   | 0.62 | 0.36-1.05 | 0.076            |
| N mutations per tumor     |                             |               |             | 1.04 | 1.01-1.07 | <b>0.021</b>     |
| N mutated genes per tumor |                             |               |             | 1.09 | 1.02-1.16 | <b>0.009</b>     |
| Age                       |                             |               |             | 1.05 | 1.02-1.07 | <b>&lt;0.001</b> |
| Ki67                      |                             |               |             | 0.99 | 0.98-1.01 | 0.314            |

N, number; HR, hazard ratio; CI, confidence interval
